# Supplementary material for: Trim33 Binds and Silences a Class of Young Endogenous Retroviruses in the Mouse Testis; a Novel Component of the Arms Race between Retrotransposons and the Host Genome
Source: PubMed Central journal article supplement (PMC4666613; doi:10.1371/journal.pgen.1005693), 2015-12-01
Supplement: pgen.1005693.s006.pdf [file pgen.1005693.s006.pdf]

Significant motifs (E-value  $\leq 0.05$ ) identified in Trim33 ChIP seq peaks, using the program MEME

| Enriched motifs similar to known transcription factors | E-value | Distribution                                                                      |
|--------------------------------------------------------|---------|-----------------------------------------------------------------------------------|
| MYB (MA0100.2)                                         | 1.2e-22 |  |
| ZEB1 (MA0103.2)                                        | 3.0e-16 |  |
| NRF1 (MA0506.1)                                        | 5.8e-5  |  |
| Zfx (MA0146.2)                                         | 1.6e-4  |  |
| NFYB (MA0502.1)                                        | 1.4e-3  |  |
| NFYA (MA0060.2)                                        | 2.0e-2  |  |
| THAP1 (MA0597.1)                                       | 2.4e-2  |  |
| EGR1 (MA0162.2)                                        | 1.5e-2  |  |
