# Supplementary material for: Trim33 Binds and Silences a Class of Young Endogenous Retroviruses in the Mouse Testis; a Novel Component of the Arms Race between Retrotransposons and the Host Genome
Source: PubMed Central journal article supplement (PMC4666613; doi:10.1371/journal.pgen.1005693), 2015-12-01

A

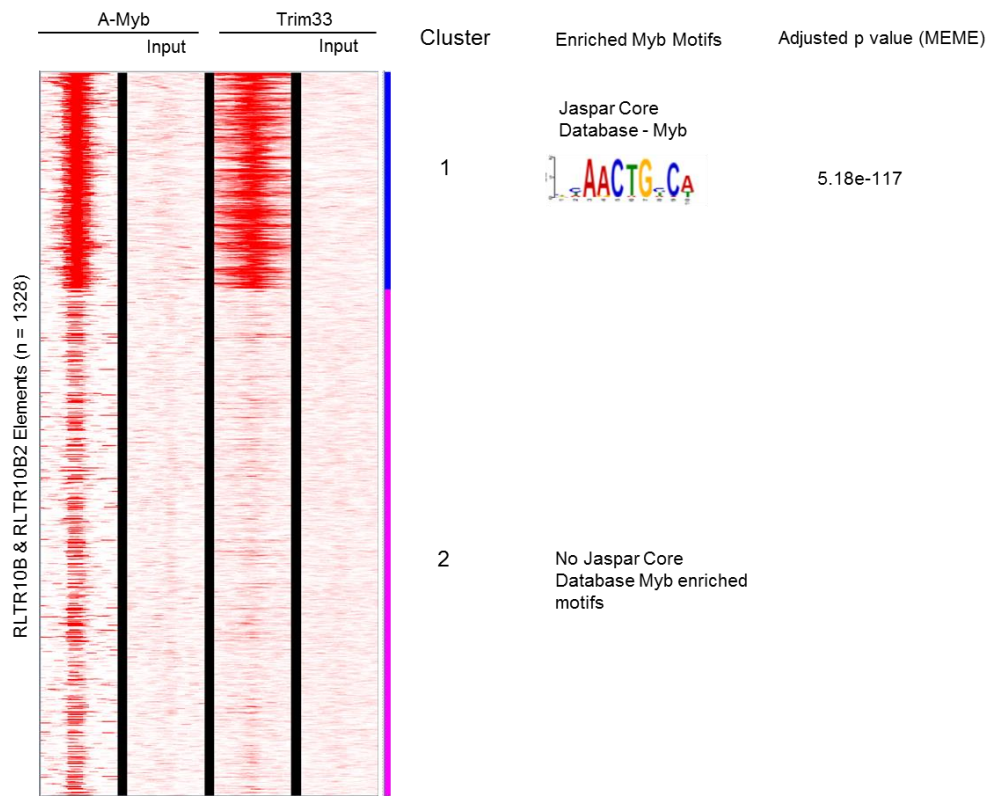

B

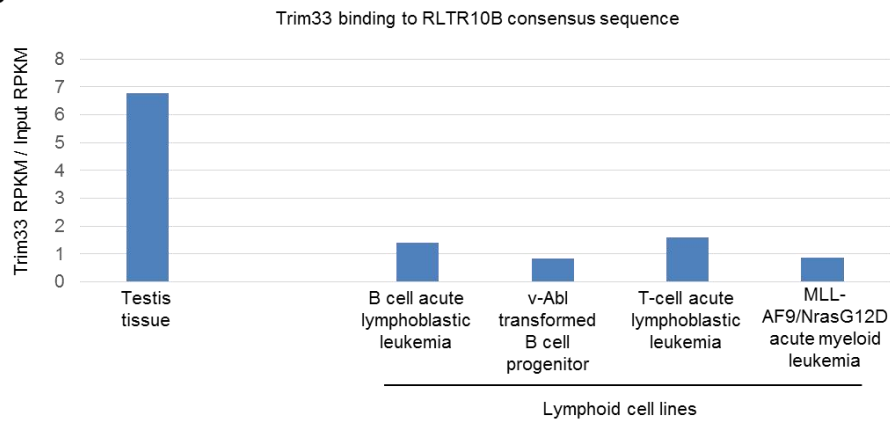

Supplement: pgen.1005693.s007.pdf [file pgen.1005693.s007.pdf]
